# Supplementary material for: Evaluating the Diagnostic Performance of Systemic Immune-Inflammation Index in Childhood Inflammatory Arthritis: A Focus on Differentiating Juvenile Idiopathic Arthritis from Reactive Arthritis
Source: MDPI journal article supplement (doi:10.3390/biomedicines12010065), 2023-12-27
Supplement: s1 [file s1]

| Disease                                  | Frequency (percent/number) |
|------------------------------------------|----------------------------|
| JIA                                      |                            |
| • enthesitis related arthritis           | 31.4 (22)                  |
| • polyarthritis, RF negative             | 20 (14)                    |
| • polyarthritis, RF positive             | 8.6 (6)                    |
| • systemic arthritis                     | 7.1 (5)                    |
| • psoriatic arthritis                    | 5.7 (4)                    |
| • oligoarthritis, persistent or extended | 27.1 (19)                  |
| Reactive Arthritis                       |                            |
| • nasopharyngeal trigger                 | 71.1 (27)                  |
| • urogenital trigger                     | 7,9 (3)                    |
| • intestinal trigger                     | 21 (8)                     |
