# Supplementary material for: Evaluating the Diagnostic Performance of Systemic Immune-Inflammation Index in Childhood Inflammatory Arthritis: A Focus on Differentiating Juvenile Idiopathic Arthritis from Reactive Arthritis
Source: MDPI journal article supplement (doi:10.3390/biomedicines12010065), 2023-12-27
Supplement: s1 [file s1]

| JIA group |   |        |        |            |            |
|-----------|---|--------|--------|------------|------------|
|           |   | CRP    | ESR    | fibrinogen | gamma-glob |
| NLR       | q | 0.563  | 0.228  | 0.418      | 0.064      |
|           | p | < 0.01 | 0.078  | < 0.04     | 0.679      |
| SII       | q | 0.579  | 0.430  | 0.531      | 0.195      |
|           | p | < 0.01 | < 0.01 | < 0.01     | 0.206      |
| ReA group |   |        |        |            |            |
|           |   | CRP    | ESR    | fibrinogen | gamma-glob |
| NLR       | q | 0.463  | 0.182  | 0.242      | 0.349      |
|           | p | 0.040  | 0.303  | 0.243      | 0.156      |
| SII       | q | 0.366  | 0.171  | 0.331      | 0.295      |
|           | p | 0.028  | 0.335  | 0.106      | 0.234      |
